# Supplementary material
Source: ML conference proceedings conference paper supplement (https://proceedings.mlr.press/v119/gupta20a.html)
Supplement: Supplementary file [file gupta20a-supp.pdf]

---

# Supplementary: Neural Topic Modeling with Continual Lifelong Learning

---

Pankaj Gupta<sup>1</sup> Yatin Chaudhary<sup>1,2</sup> Thomas Runkler<sup>1</sup> Hinrich Schütze<sup>2</sup>

## A. Data Description

Discussed in section 3, we perform lifelong topic learning over following three streams:

**S1:** AGnews  $\rightarrow$  TMN  $\rightarrow$  R21578  $\rightarrow$  20NS  $\rightarrow$  20NSshort

**S2:** AGnews  $\rightarrow$  TMN  $\rightarrow$  R21578  $\rightarrow$  20NS  $\rightarrow$  TMNtitle

**S3:** AGnews  $\rightarrow$  TMN  $\rightarrow$  R21578  $\rightarrow$  20NS  $\rightarrow$  R21578title

Each stream of document collections consisting of four long-text (high-resource) corpora in sequence: AGnews, TMN, R21578 and 20NS (20NewsGroups), and three short-text (low-resource, sparse) corpora  $T + 1$  as future (target) tasks  $T + 1$ : 20NSshort, TMNtitle and R21578title.

Following is the description of document collections used in this work:

1. 20NSshort: We take documents from 20NewsGroups data, with document size (number of words) less than 20.
2. TMNtitle: Titles of the Tag My News (TMN) news dataset.
3. R21578title: Reuters corpus, a collection of new stories from [nltk.corpus](http://nltk.corpus). We take titles of the documents.
4. TMN: The Tag My News (TMN) news dataset.
5. R21578: Reuters corpus, a collection of new stories from [nltk.corpus](http://nltk.corpus).
6. AGnews: AGnews data selection.
7. 20NS: 20NewsGroups corpus, a collection of news stories from [nltk.corpus](http://nltk.corpus).

See Table 1 for the description of each of the document collections used in our experiments. Observe that we employ sparse document collections as target datasets.

---

<sup>1</sup>Corporate Technology, Siemens AG Munich, Germany <sup>2</sup>CIS, University of Munich (LMU) Munich, Germany. Correspondence to: Pankaj Gupta <pankaj.gupta@drimco.net>.

Table 1. Data statistics: Document collections used in lifelong topic modeling. Symbols-  $K$ : vocabulary size,  $L$ : average text length (#words),  $C$ : number of classes and  $k$ : thousand. For short-text,  $L < 15$ . We use  $\mathcal{T}^1$ ,  $\mathcal{T}^2$  and  $\mathcal{T}^3$  are treated as target corpora for future tasks  $T + 1$  of topic modeling and  $\mathcal{S}^1$ - $\mathcal{S}^4$  are used as historical corpora in the stream of document collections.

| ID              | Data        | Train | Val  | Test | $K$  | L     | C  |
|-----------------|-------------|-------|------|------|------|-------|----|
| $\mathcal{T}^1$ | 20NSshort   | 1.3k  | 0.1k | 0.5k | 1.4k | 13.5  | 20 |
| $\mathcal{T}^2$ | TMNtitle    | 22.8k | 2.0k | 7.8k | 2k   | 4.9   | 7  |
| $\mathcal{T}^3$ | R21578title | 7.3k  | 0.5k | 3.0k | 2k   | 7.3   | 90 |
| $\mathcal{S}^1$ | AGNews      | 118k  | 2.0k | 7.6k | 5k   | 38    | 4  |
| $\mathcal{S}^2$ | TMN         | 22.8k | 2.0k | 7.8k | 2k   | 19    | 7  |
| $\mathcal{S}^3$ | R21578      | 7.3k  | 0.5k | 3.0k | 2k   | 128   | 90 |
| $\mathcal{S}^4$ | 20NS        | 7.9k  | 1.6k | 5.2k | 2k   | 107.5 | 20 |

Table 2. Illustration of Domain-overlap in pairs of corpora, when used in source-target settings.  $\mathcal{I}$ : Identical,  $\mathcal{R}$ : Related and  $\mathcal{D}$ : Distant domains determined based on overlap in labels

|                 | $\mathcal{T}^1$ | $\mathcal{T}^2$ | $\mathcal{T}^3$ |
|-----------------|-----------------|-----------------|-----------------|
| $\mathcal{S}^1$ | $\mathcal{R}$   | $\mathcal{R}$   | $\mathcal{D}$   |
| $\mathcal{S}^2$ | $\mathcal{R}$   | $\mathcal{I}$   | $\mathcal{D}$   |
| $\mathcal{S}^3$ | $\mathcal{D}$   | $\mathcal{D}$   | $\mathcal{I}$   |
| $\mathcal{S}^4$ | $\mathcal{I}$   | $\mathcal{R}$   | $\mathcal{D}$   |

Table 2 suggests a domain overlap (in terms of labels) among the document collections used in transfer learning within neural topic modeling framework. The notations such as  $\mathcal{I}$ ,  $\mathcal{R}$  and  $\mathcal{D}$  represent domain overlap, where  $\mathcal{I}$  (identical): identical-domain in terms of labels in pair of datasets,  $\mathcal{R}$  (related): related-domain due to partial overlap in labels, and  $\mathcal{D}$ : distant-domain due to no overlap in labels of pair of document collections.

See Table 3 for the label information for each of the document collections used in streams of information to model.

To reproduce the scores reported, we have also provided the **code** of the LNTM framework and **pre-processed datasets** used in our experiments.

Table 3. Label space of the document collections used

| data                  | labels / classes                                                                                                                                                                                                                                                                                                                                                                                                                                                                                                                                                                                                                                                                                                      |
|-----------------------|-----------------------------------------------------------------------------------------------------------------------------------------------------------------------------------------------------------------------------------------------------------------------------------------------------------------------------------------------------------------------------------------------------------------------------------------------------------------------------------------------------------------------------------------------------------------------------------------------------------------------------------------------------------------------------------------------------------------------|
| TMN                   | world, us, sport, business, sci_tech, entertainment, health                                                                                                                                                                                                                                                                                                                                                                                                                                                                                                                                                                                                                                                           |
| TMNtitle              | world, us, sport, business, sci_tech, entertainment, health                                                                                                                                                                                                                                                                                                                                                                                                                                                                                                                                                                                                                                                           |
| AGnews                | business, sci_tech, sports, world                                                                                                                                                                                                                                                                                                                                                                                                                                                                                                                                                                                                                                                                                     |
| 20NS<br>20NSshort,    | misc.forsale, comp.graphics, rec.autos, comp.windows.x,<br>rec.sport.baseball, sci.space, rec.sport.hockey,<br>soc.religion.christian, rec.motorcycles, comp.sys.mac.hardware,<br>talk.religion.misc, sci.electronics, comp.os.ms-windows.misc,<br>sci.med, comp.sys.ibm.pc.hardware, talk.politics.mideast,<br>talk.politics.guns, talk.politics.misc, alt.atheism, sci.crypt                                                                                                                                                                                                                                                                                                                                        |
| R21578title<br>R21578 | trade, grain, crude, corn, rice, rubber, sugar, palm-oil,<br>veg-oil, ship, coffee, wheat, gold, acq, interest, money-fx,<br>carcass, livestock, oilseed, soybean, earn, bop, gas, lead, zinc,<br>gnp, soy-oil, dlr, yen, nickel, groundnut, heat, sorghum, sunseed,<br>cocoa, rapeseed, cotton, money-supply, iron-steel, palladium,<br>platinum, strategic-metal, reserves, groundnut-oil, lin-oil, meal-feed,<br>sun-meal, sun-oil, hog, barley, potato, orange, soy-meal, cotton-oil,<br>fuel, silver, income, wpi, tea, lei, coconut, coconut-oil, copra-cake,<br>propane, instal-debt, nzdlr, housing, nkr, rye, castor-oil, palmkernel,<br>tin, copper, cpi, pet-chem, rape-oil, oat, naphtha, cpu, rand, alum |

Table 4. Hyper-parameters search space in the Generalization task

| Hyperparameter              | Search Space       |
|-----------------------------|--------------------|
| retrieval fraction          | [0.02]             |
| learning rate               | [0.001]            |
| hidden units (#topics), $H$ | [50, 200]          |
| activation function ( $g$ ) | sigmoid            |
| iterations                  | [100]              |
| $\lambda_{TR}$              | [0.1, 0.01, 0.001] |
| $\lambda_{EmbTF}$           | [1.0, 0.5, 0.1]    |
| $\lambda_{SAL}$             | [1.0, 0.5, 0.1]    |

Table 5. Hyper-parameters search space in the IR task

| Hyperparameter              | Search Space       |
|-----------------------------|--------------------|
| retrieval fraction          | [0.02]             |
| learning rate               | [0.001]            |
| hidden units (#topics), $H$ | [50, 200]          |
| activation function ( $g$ ) | tanh               |
| iterations                  | [100]              |
| $\lambda_{TR}$              | [0.1, 0.01, 0.001] |
| $\lambda_{EmbTF}$           | [1.0, 0.5, 0.1]    |
| $\lambda_{SAL}$             | [1.0, 0.5, 0.1]    |

## B. Reproducibility: Hyper-parameter Settings

In the following sections, we provide the hyper-parameter settings (search space) used to build topic models based on development set.

### B.1. Hyper-parameter settings for Generalization

Table 4 provides hyper-parameters search space used within lifelong topic modeling framework for generalization task over lifetime. The models built are used further in extracting topics and computing topic coherence.

### B.2. Hyper-parameter settings for IR Task

Table 5 provides hyper-parameters search space used within lifelong topic modeling framework for information retrieval task over lifetime.

### B.3. Optimal Configurations of $\lambda^{TR}$ , $\lambda^{EmbTF}$ , $\lambda^{SAL}$

Tables 6 and 7 provide the optimal (best) hyper-parameter setting for generalization and IR task, respectively for each of the three target datasets. The hyper-parameters corresponds to the scores reported in the paper content.

To reproduce the scores reported, we have also provided the **code** of the LNTM framework and **pre-processed datasets** used in our experiments.

To reproduce the scores reported, we have also provided the

Table 6. Generalization Task: Optimal settings of hyper-parameters ( $\lambda_{TR} / \lambda_{EmbTF} / \lambda_{SAL}$ ) for each of the three streams where the datasets: 20NSshort, TMNtitle and R21578title are treated as targets, respectively in each of the streams. The optimal hyper-parameters are obtained in joint training of three approaches: TR, EmbTF and SAL with the proposed LNTM framework.

| Target      | Stream    | Hyper-parameters ( $\lambda_{TR} / \lambda_{EmbTF} / \lambda_{SAL}$ ) for Streams of Document Collections |                   |                   |                   |
|-------------|-----------|-----------------------------------------------------------------------------------------------------------|-------------------|-------------------|-------------------|
|             |           | AGnews                                                                                                    | TMN               | R21578            | 20NS              |
| 20NSshort   | <b>S1</b> | 0.001 / 0.1 / 1.0                                                                                         | 0.001 / 0.1 / 1.0 | 0.001 / 0.1 / 1.0 | 0.001 / 1.0 / 1.0 |
| TMNtitle    | <b>S2</b> | 0.001 / 0.1 / 0.1                                                                                         | 0.001 / 1.0 / 1.0 | 0.001 / 0.1 / 0.1 | 0.001 / 0.1 / 0.1 |
| R21578title | <b>S3</b> | 0.001 / 0.1 / 0.1                                                                                         | 0.001 / 0.1 / 0.1 | 0.001 / 1.0 / 0.1 | 0.1 / 0.1 / 0.1   |

Table 7. IR Task: Optimal settings of hyper-parameters ( $\lambda_{TR} / \lambda_{EmbTF} / \lambda_{SAL}$ ) for each of the three streams where the datasets: 20NSshort, TMNtitle and R21578title are treated as targets, respectively in each of the streams. The optimal hyper-parameters are obtained in joint training of three approaches: TR, EmbTF and SAL with the proposed LNTM framework.

| Target      | Stream    | Hyper-parameters ( $\lambda_{TR} / \lambda_{EmbTF} / \lambda_{SAL}$ ) for Streams of Document Collections |                   |                   |                   |
|-------------|-----------|-----------------------------------------------------------------------------------------------------------|-------------------|-------------------|-------------------|
|             |           | AGnews                                                                                                    | TMN               | R21578            | 20NS              |
| 20NSshort   | <b>S1</b> | 0.001 / 0.1 / 1.0                                                                                         | 0.001 / 0.1 / 1.0 | 0.001 / 0.1 / 1.0 | 0.001 / 1.0 / 1.0 |
| TMNtitle    | <b>S2</b> | 0.001 / 0.1 / 0.1                                                                                         | 0.01 / 1.0 / 1.0  | 0.001 / 0.1 / 0.1 | 0.001 / 0.1 / 0.1 |
| R21578title | <b>S3</b> | 0.001 / 0.1 / 1.0                                                                                         | 0.001 / 0.1 / 1.0 | 0.001 / 1.0 / 1.0 | 0.1 / 0.1 / 1.0   |

code of the LNTM framework and pre-processed datasets used in our experiments.
